# Supplementary material for: 7-dehydrocholesterol efficiently supports Ret signaling in a mouse model of Smith-Opitz-Lemli syndrome
Source: PubMed Central journal article supplement (PMC4917867; doi:10.1038/srep28534), 2016-06-23
Supplement: srep28534-s1.pdf [file srep28534-s1.pdf]

## 7-dehydrocholesterol efficiently supports Ret signaling in a mouse model of Smith-Optiz-Lemli syndrome

Myriam Gou-Fàbregas<sup>1,2,\*</sup>, Anna Macià<sup>1</sup>, Carlos Anerillas<sup>1</sup>, Marta Vaquero<sup>1</sup>, Mariona Jové<sup>3</sup>, Sanjay Jain<sup>4</sup>, Joan Ribera<sup>1</sup>, and Mario Encinas<sup>1,\*</sup>

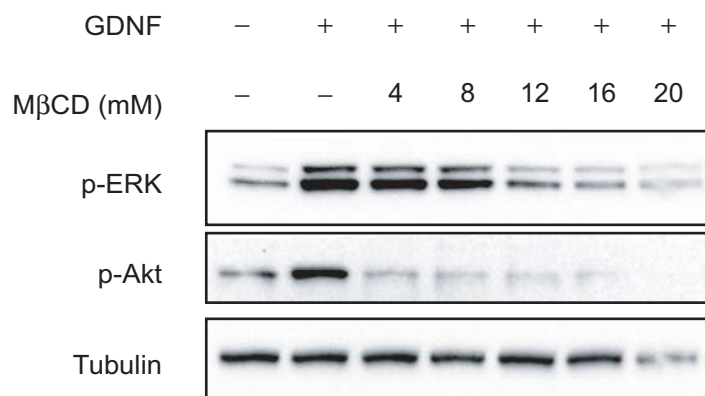

### Supplemental Figure 1

Depletion of membrane cholesterol impairs Ret downstream signaling. MG87 cells were treated with methyl- $\beta$ -cyclodextrin (M $\beta$ CD) at the indicated concentrations for 30 min to deplete cholesterol from the cell membrane, followed by GDNF stimulation (50 ng/ml, 10 min). Total lysates were resolved by SDS-PAGE and probed with the indicated antibodies.

Supplemental Table 1. List of antibodies used in this study

| Antibody                                      | Company         | Catalog # | Use                | Dilution |
|-----------------------------------------------|-----------------|-----------|--------------------|----------|
| Calbindin                                     | Swant           | CB38a     | Immunofluorescence | 1/500    |
| Caveolin-1                                    | BD Transduction | 610406    | Western Blot       | 1/1000   |
| c-Src                                         | Upstate         | 16-182    | Western Blot       | 1/2000   |
| Flotillin-1                                   | BD Transduction | 610820    | Western Blot       | 1/1000   |
| Gfr $\alpha$ 1                                | Abcam           | ab8026    | Western Blot       | 1/1000   |
| GM-1 (HRP-conjugated cholera toxin B subunit) | Millipore       | 227041    | Western Blot       | 1/2000   |
| Phospho-Akt                                   | Cell Signalling | 4060      | Western Blot       | 1/1000   |
| Phospho-Erk                                   | Cell Signalling | 9101      | Western Blot       | 1/10000  |
| PGP9.5                                        | Millipore       | AB1761    | Immunofluorescence | 1/500    |
| TfR                                           | Zymed           | 13-6800   | Western Blot       | 1/2000   |
| Tubulin                                       | Sigma           | T5168     | Western Blot       | 1/50000  |
